# Supplementary material for: Identification of EGFR as a Novel Key Gene in Clear Cell Renal Cell Carcinoma (ccRCC) through Bioinformatics Analysis and Meta-Analysis
Source: Biomed Res Int. 2019 Feb 13;2019:6480865. doi: 10.1155/2019/6480865 (PMC6393869; doi:10.1155/2019/6480865)
Supplement: Supplementary Materials — In Table S1, a total of 127 DEGs (Figure 1 and Table S1) were shown, including 55 upregulated genes and 72 downregulated genes. [file 6480865.f1.xlsx]

## Sheet: 工作表1
UP-regulated genes				Down-regulated genes
EDN1	SSPN	SLC38A1		TEX264	ENTPD5	AGMAT
PTPN22	P2RX7	RNASET2		ERBB4	PNPLA3	KCNJ15
DUSP4	LOC101928615	EGLN3		GPHN	SLC12A3	HSD17B14
CHST11	FBXO16	PPP1R3C		RIDA	SLC5A12	GATM
FYB	NETO2	FZD1		MIR6778	ACADSB	CISH
ZNF395	MMRN2	CP		ST3GAL1	PFKFB2	LINC00472
TCF4	ABCG1	BIRC3		TFCP2L1	SLC22A7	ACSM2B
STK10	CD36			ADI1	CLCN5	PRODH2
OGFRL1	DCLK1			QPRT	LOC100507855	PARM1
FLT1	MS4A6A			AQP2	FGF9	SLC16A10
ERAP2	CTSS			LOC101929036	PSAT1	WLS
ANGPTL4	ABCC3			CLSTN2	SCN2A	ALDOB
SAMHD1	TBXAS1			SULT1C2	PAQR5	SLC13A3
SPRY1	GBP2			PAPPA	GLYAT	SLIT2
MS4A4A	ALDOA			ABCB1	SUSD4	FTCD
EGFR	TLR3			ATP1A1	GSTM3	CLMN
FXYD5	ANGPT2			KCNK10	KNG1	DNAJC12
GBP1	MARCKS			SLC22A8	MECOM	TMPRSS2
NFE2L3	NLGN1			BHMT2	PCDH9	DPP6
NCKAP1L	TMCC1			SLC13A2	TRPM3	ARHGAP24
GNG11	ZEB2			TCF21	PLG	USP2
PCDH17	MAP1B			NUDT6	HAO2	PPP1R1A
ZNF532	RSAD2			NOX4	ENPP1	IL17RB
ENTPD1	PDK1			SGK2	TKFC
